# Supplementary material
Source: PubMed Central journal article supplement (PMC4708258)
Supplement: NIHMS571066-supplement-Supp_figureS1-2.pdf [file NIHMS571066-supplement-Supp_figureS1-2.pdf]

## **Supporting Information**

Wild yeast harbor a variety of distinct amyloid structures with strong prion-inducing capabilities  
Laura Westergard and Heather L. True

Department of Cell Biology and Physiology, Washington University in St. Louis, St. Louis, MO  
63110, USA.

\* Corresponding Author

Email addresses:

LW: laurawestergard@wustl.edu

HLT: heather.true@wustl.edu

Phone: 314-362-3934

Fax: 314-362-7463

Running Title: Wild Yeast Harbor Distinct Amyloid Structures

**Keywords:** prion; amyloid; aggregation; variants; yeast; adaptation

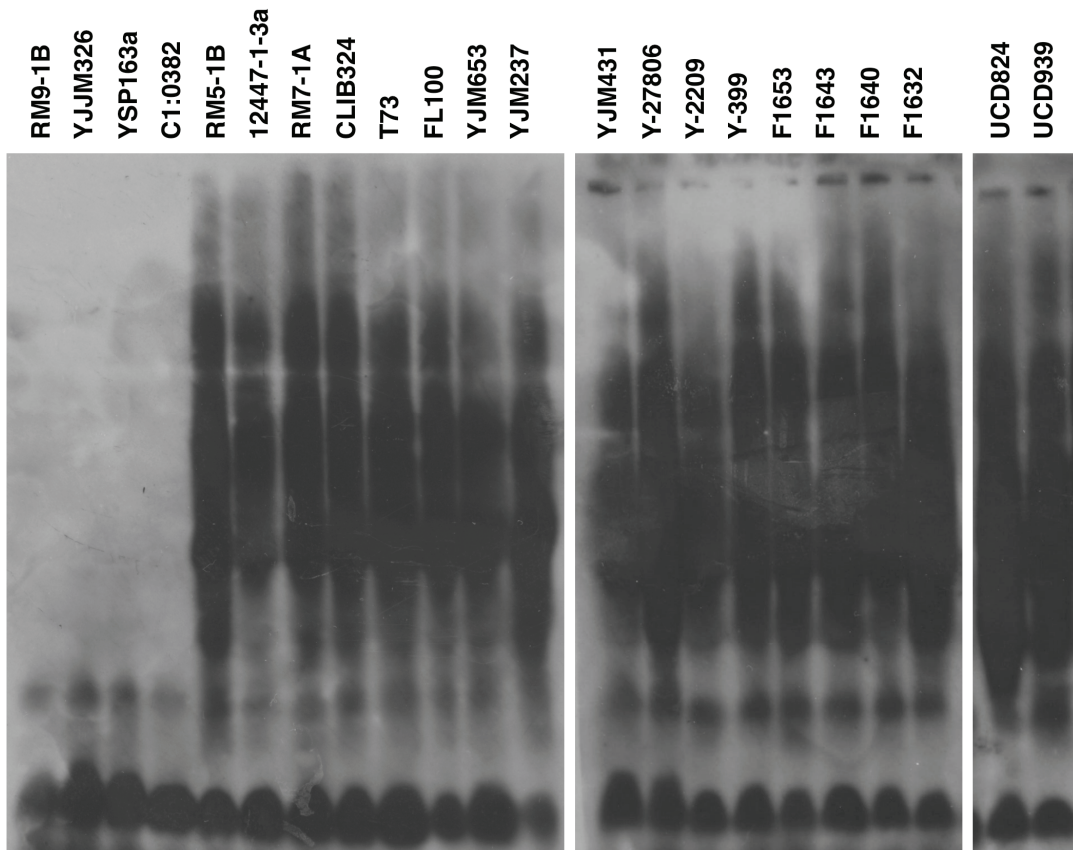

**Fig S1.  $[RNQ^+]$  prions are efficiently cytoduced and propagated in 74-D694 yeast.** Cell lysates from 74-D694 yeast cytoduced with wild  $[RNQ^+]$  prions were incubated for 7 minutes at 25°C and subjected to SDD-AGE and western blotting using an anti-Rnq1 antibody.

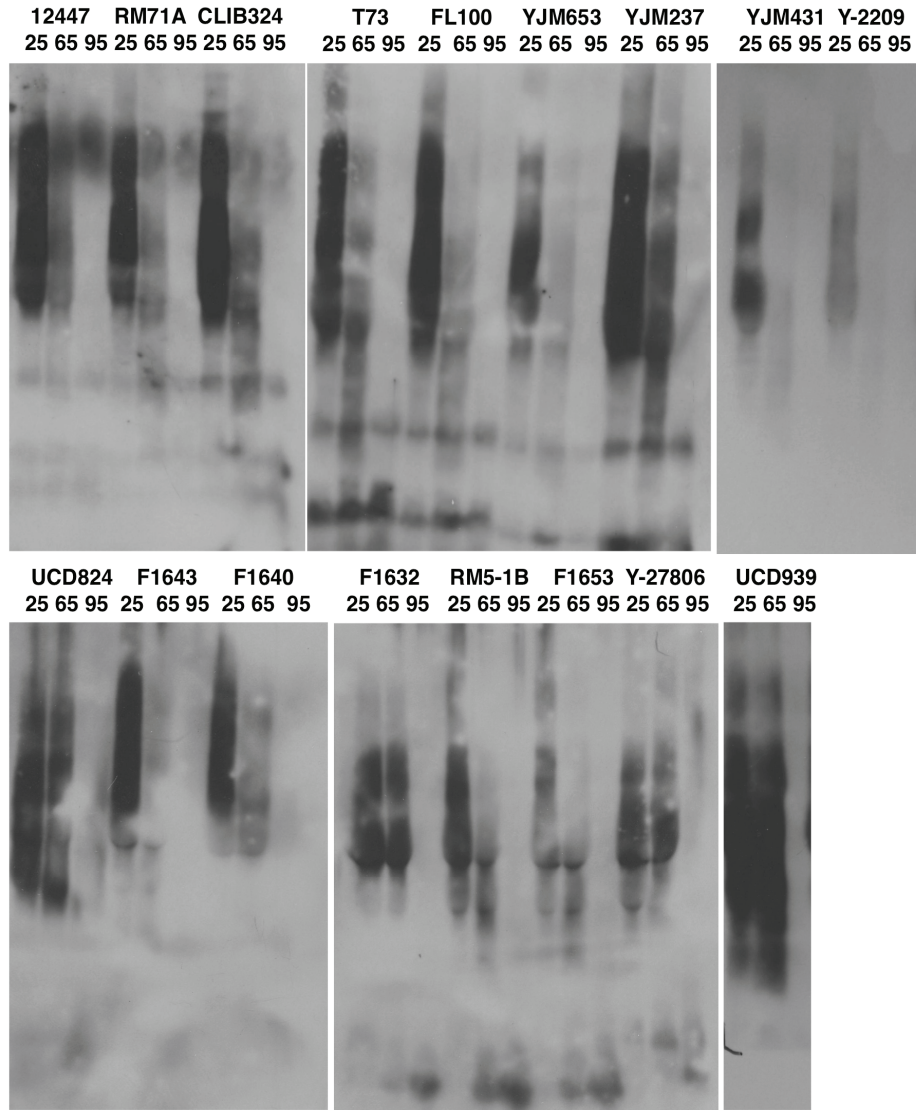

**Fig S2.  $[RNQ^+]$  variants can be distinguished by differences in temperature sensitivity.** Cell lysates from 74-D694 yeast cytoduced with wild  $[RNQ^+]$  prions were incubated for 7 minutes at 25°C, 65°C or 95°C. Lysates were then subjected to SDD-AGE and western blotting using an anti-Rnq1 antibody.
